# Supplementary material for: Inhibitory Effects of Quercetin and Its Main Methyl, Sulfate, and Glucuronic Acid Conjugates on Cytochrome P450 Enzymes, and on OATP, BCRP and MRP2 Transporters
Source: PubMed Central journal article supplement (PMC7468908; doi:10.3390/nu12082306), 2020-07-31
Supplement: nutrients-12-02306-s001.pdf [file nutrients-12-02306-s001.pdf]

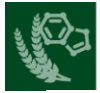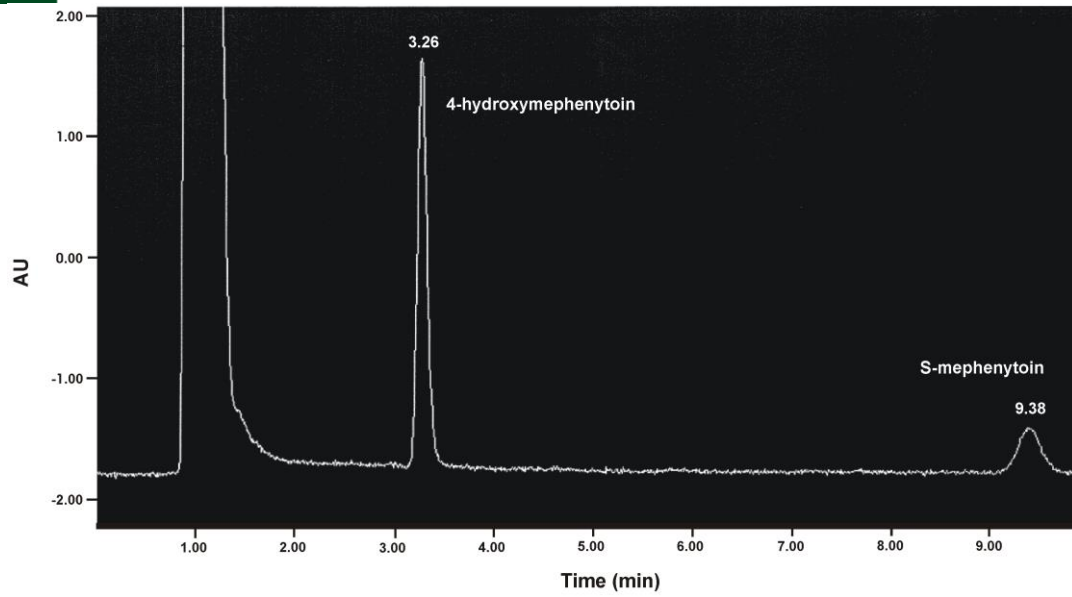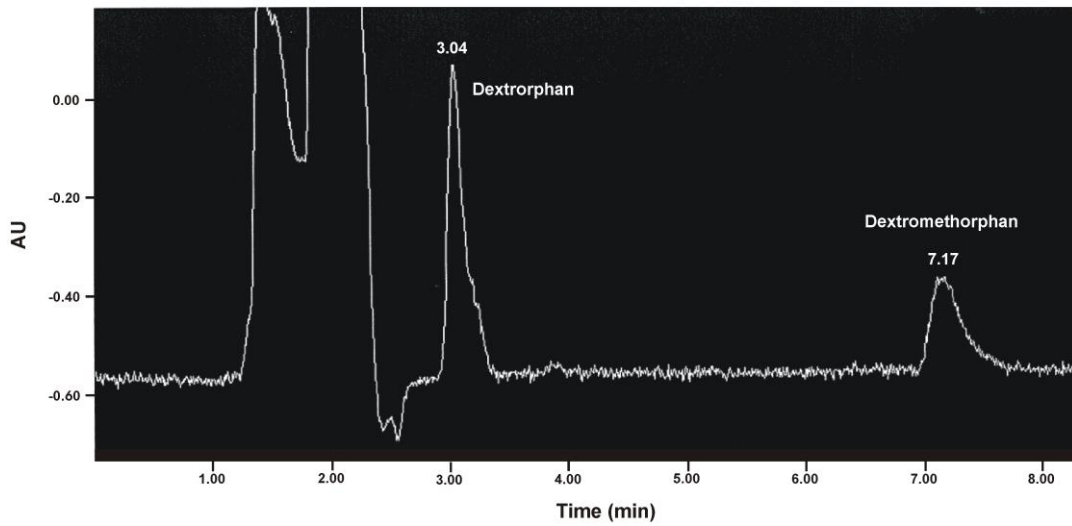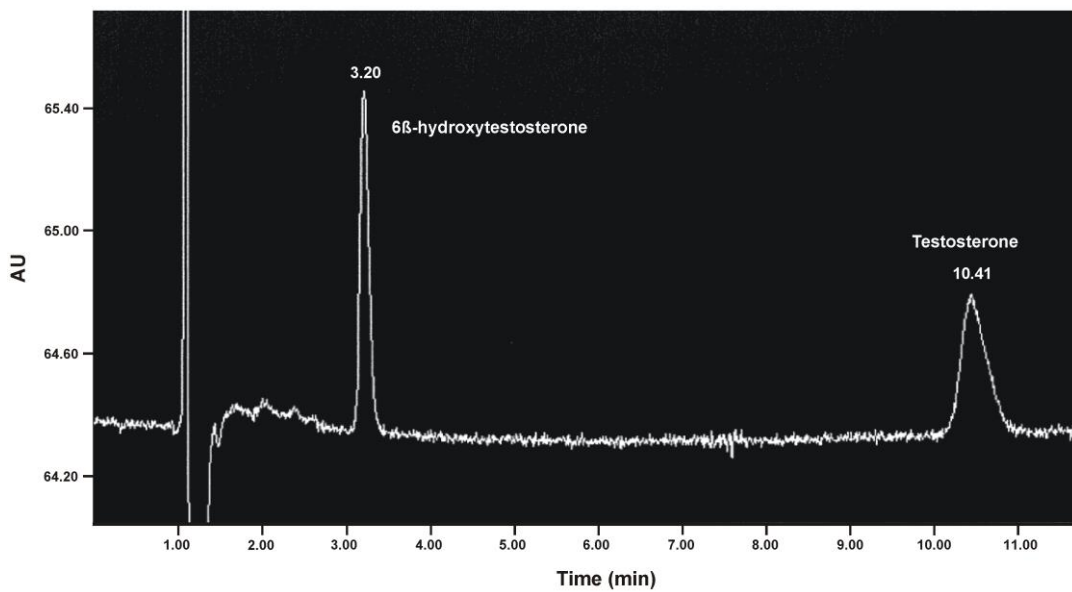

**Figure S1.** Representative chromatograms of S-mephenytoin and 4-hydroxymephenytoin (top, CYP2C19 assay), dextromethorphan and dextrorphan (middle, CYP2D6 assay) as well as testosterone and 6 $\beta$ -hydroxytestosterone (bottom, CYP3A4 assay) (each 2.5  $\mu$ M).
